# Supplementary material
Source: PubMed Central journal article supplement (PMC5689131)

## Supplemental Figure Legends

**Supplemental Figure 1.** Antibody array analysis of conditioned media from endothelial cells after treatment with exosomes ( $*p < 0.05$  and  $**p = 0.06$ ). The control media is media that has not been exposed to cells (Media), the control group (Ctrl) is conditioned media from untreated cells and the exosome group (Exo) is conditioned media from cell treated with exosomes. This information has now been included in the figure legend.

**Supplemental Figure 2.** Fibroblasts were treated with 1-methyl-3-nitro-1-nitrosoguanidine for three days. The cells were then treated with exosomes for two weeks at the indicated concentrations and then tested for colony formation in a soft agar assay.

**Supplemental Figure 3.** Release kinetics of exosomes from alginate beads. Alginate gels were loaded with exosomes at the same concentration used for the *in vivo* studies and incubated at 37°C in PBS. The supernatant was collected at specific time points and assayed for exosome concentration using a CD63 ELISA.

# Supplemental Figure 1

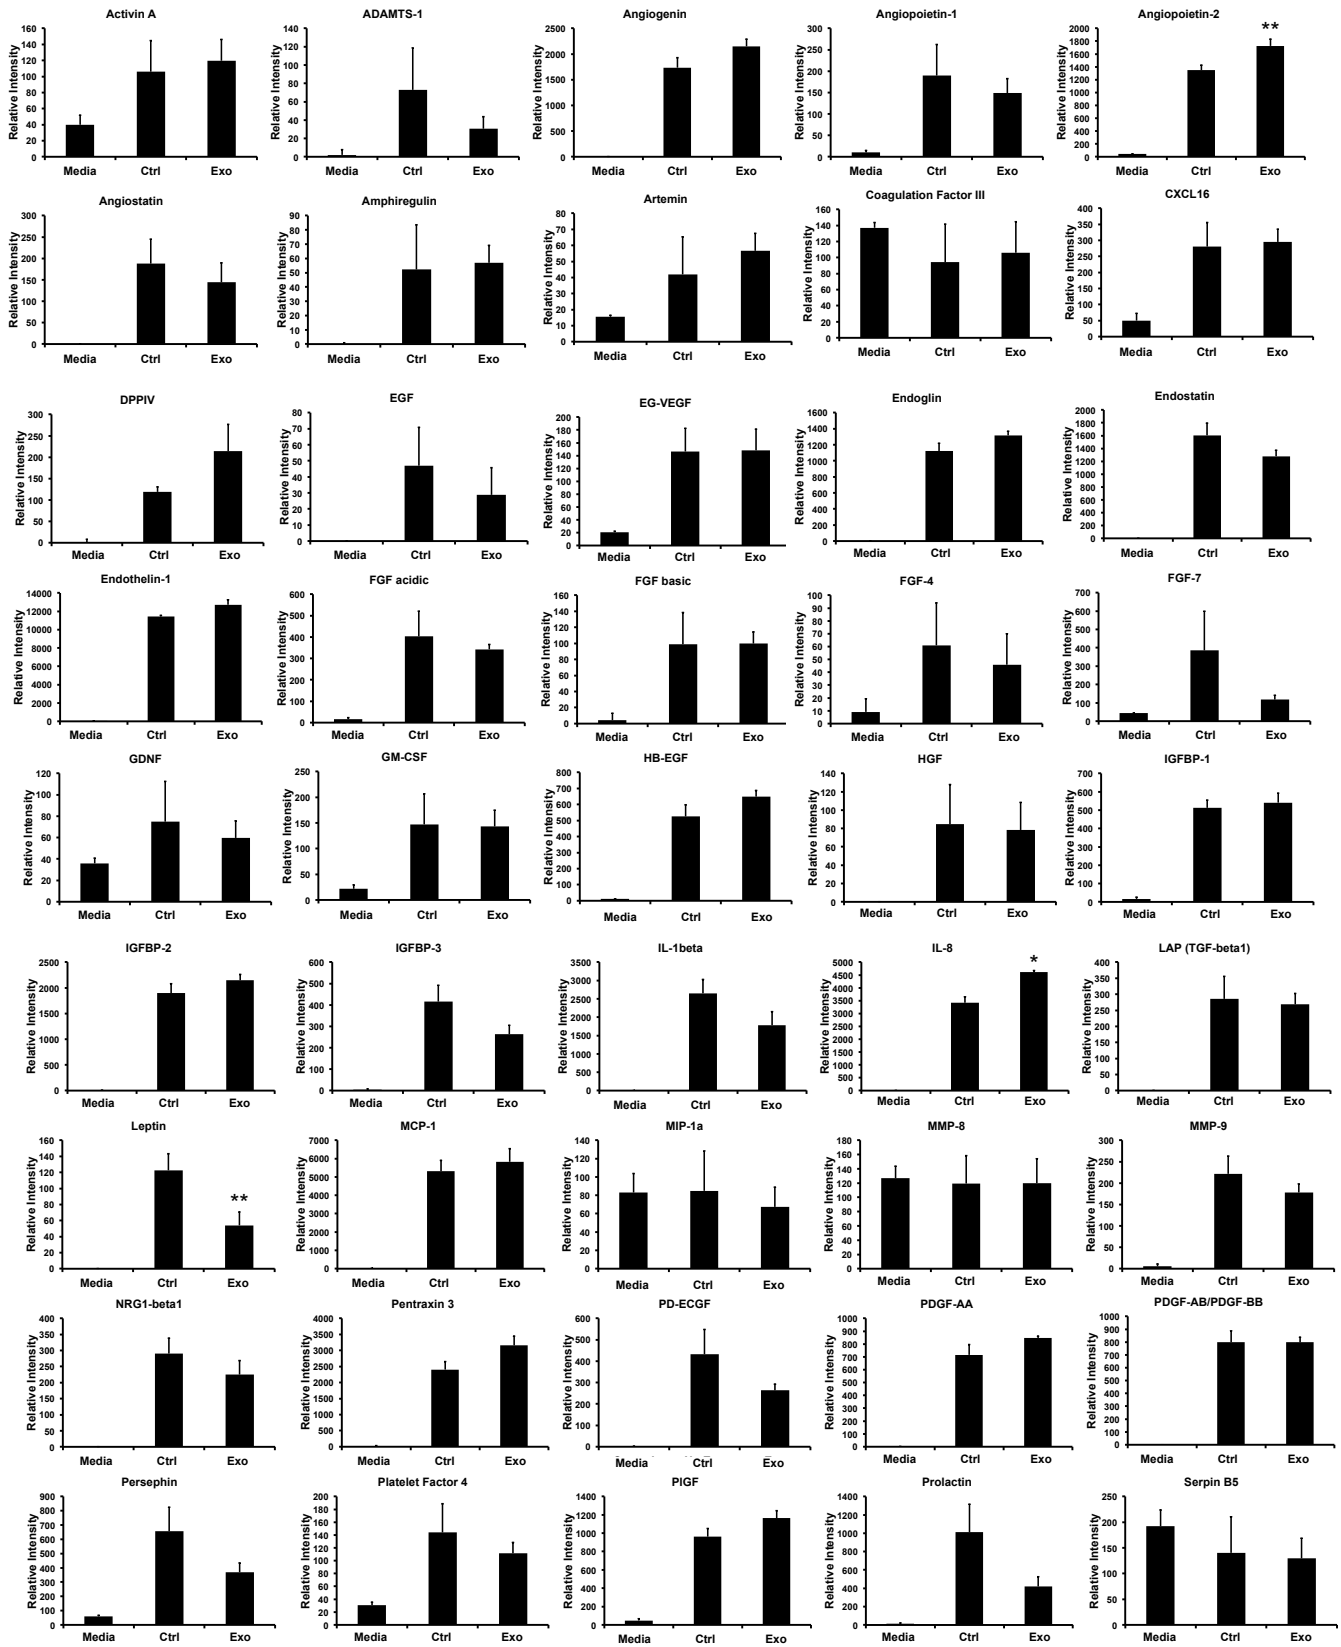

# Supplemental Figure 1 (con't)

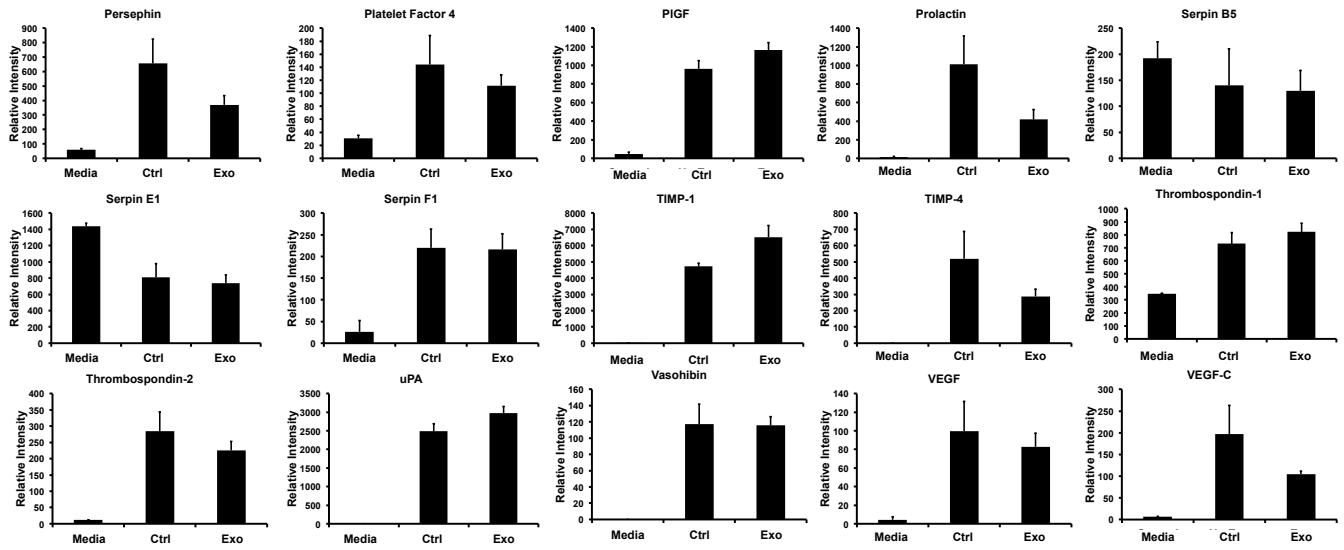

**Supplemental Figure 2**

**No Treatment**

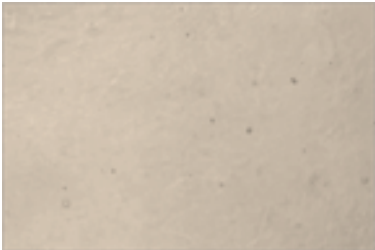

**4.4x10<sup>8</sup> exo/mL**

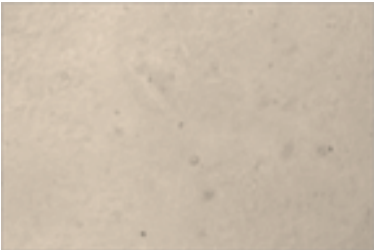

**30x10<sup>8</sup> exo/mL**

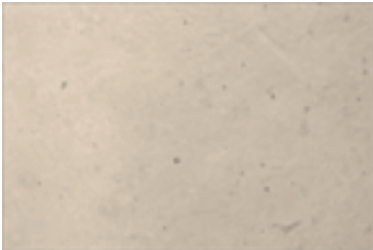

Supplemental Figure 3

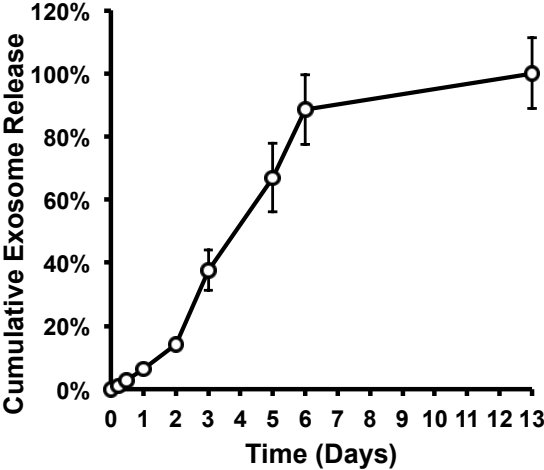

Supplement: Supp_Figures1-3.pdf [file Supp_Figures1-3.pdf]
